# Comparative efficacy, safety, and acceptability of single-agent poly (ADP-ribose) polymerase (PARP) inhibitors in *BRCA*-mutated *HER2*-negative metastatic or advanced breast cancer: a network meta-analysis

Ju Wang<sup>1</sup>, Ye Zhang<sup>2</sup>, Long Yuan<sup>2</sup>, Lin Ren<sup>2</sup>, Yi Zhang<sup>2</sup>, Xiaowei Qi<sup>2</sup>

<sup>1</sup>Chongqing Municipal Center for Disease Control and Prevention, Chongqing, P.R. China

<sup>2</sup>Department of Breast and Thyroid Surgery, Southwest Hospital, Third Military Medical University, Army Medical University, Chongqing, P.R. China

**Correspondence to:** Xiaowei Qi; email: [gxw9908@foxmail.com](mailto:gxw9908@foxmail.com), <https://orcid.org/0000-0002-5876-4957>

**Keywords:** ADP-ribose, PARPi, breast cancer, efficacy, network meta-analysis

**Received:** April 16, 2020

**Accepted:** October 5, 2020

**Published:** November 30, 2020

**Copyright:** © 2020 Wang et al. This is an open access article distributed under the terms of the [Creative Commons Attribution License](https://creativecommons.org/licenses/by/3.0/) (CC BY 3.0), which permits unrestricted use, distribution, and reproduction in any medium, provided the original author and source are credited.

## ABSTRACT

**Background:** Breast cancer is the most commonly diagnosed cancer and is the leading cause of cancer death in women worldwide. Both talazoparib and olaparib are approved by the US Food and Drug Administration for treating *BRCA* (breast cancer 1, early onset)-mutated *HER2* (human epidermal growth factor receptor 2)-negative metastatic or advanced breast cancer. However, the optimal choice of first-line treatment has not been determined.

**Objective:** To compare the efficacy, safety, and acceptability of single-agent poly (ADP-ribose) polymerase (PARP) inhibitors for patients with *BRCA*-mutated *HER2*-negative metastatic or advanced breast cancer.

**Results:** We included two trials comprising 733 participants. Compared with talazoparib, olaparib was not associated with improved PFS ( $HR = 1.08$ , 95%  $CrI = 0.34$ – $3.45$ ) or OS ( $HR = 1.18$ , 95%  $CrI = 0.61$ – $2.31$ ). Compared with talazoparib, olaparib was associated with non-significantly improved ORR ( $OR = 0.83$ , 95%  $CrI = 0.05$ – $12.64$ ). Regarding safety, olaparib had reduced risk for both grade 3–4 anemia ( $OR = 0.34$ , 95%  $CrI = 0.003$ – $34.94$ ) and any-grade anemia ( $OR = 0.37$ , 95%  $CrI = 0.02$ – $6.81$ ) compared with talazoparib. Olaparib also showed a low risk for grade 3–4 neutropenia ( $OR = 0.57$ , 95%  $CrI = 0.06$ – $5.75$ ) compared with talazoparib. Both talazoparib and olaparib were not associated with high risk of treatment discontinuation ( $OR = 0.95$ , 95%  $CrI = 0.21$ – $4.47$ ). Regarding time to QoL deterioration, olaparib was associated with short time to clinically meaningful QoL deterioration ( $HR = 1.16$ , 95%  $CrI = 0.19$ – $7.17$ ) compared to talazoparib.

**Conclusion:** Both talazoparib and olaparib have similar efficacy, safety, and acceptability in patients with *BRCA*-mutated *HER2*-negative metastatic or advanced breast cancer. Well-designed head-to-head randomized controlled trials with large samples are suggested to determine the optimal treatment choice.

**Methods:** We performed a systematic review and network meta-analysis. We performed a systematic search of Web of Science, Embase, PubMed, Medline, ClinicalTrials.gov, the Cochrane Central Register of Controlled Trials, and the World Health Organization International Clinical Trials Registry Platform, and international registers for published and unpublished double-blind randomized controlled trials from database inception to July 20, 2019. The pooled estimates of hazard ratios (HR) with 95% credible intervals (CrIs) were calculated for PFS, OS, and the time to deterioration of quality of life (QoL). The pooled estimates of odds ratio (OR) with 95% CrIs were calculated for ORR, AEs, and treatment discontinuation. This study is registered with PROSPERO (CRD42019138939).

## INTRODUCTION

Breast cancer is the most commonly diagnosed cancer, and is the leading cause of cancer death worldwide in women [1, 2]. There were approximately 2.1 million newly diagnosed female breast cancer cases in 2018, accounting for almost one-quarter of cancer cases among women worldwide [1].

Many factors increase the incidence of breast cancer, and its etiology is diverse. The cause of breast cancer is probably related to polygenic genetic factors [3, 4] and a complicated association of environmental factors [5]. Germline *BRCA1/2* (breast cancer 1/2, early onset) mutations have long been considered an important risk factor for breast cancer [6]. The inheritance of mutated *BRCA1* or *BRCA2* alleles results in a lifetime risk of breast cancer as high as 80% [7]. Furthermore, more than three-quarters of germline *BRCA* (*gBRCA*) mutant breast cancers have a molecular typing of triple-negative breast cancer (TNBC) [8]. The *BRCA1* and *BRCA2* genes are directly related to hereditary breast cancer [9], and are more frequently present in patients with a family history of breast cancer. Besides, *BRCA1/2* are tumor suppressor genes [10] that inhibit malignant tumorigenesis and encode proteins involved in repairing DNA double-strand breaks via the homologous recombination repair pathway [11].

Members of the poly (ADP-ribose) polymerase (PARP) family of nuclear enzymes play key roles in recognizing and repairing DNA single-strand breaks [10]. Under these mechanisms, preclinical studies have found that *BRCA1/2*-deficient cancer cells are sensitive to PARP inhibition [2, 12, 13]. Therefore, PARP inhibitors (PARPi) present new *gBRCA* mutation-targeted approaches in advanced breast cancer [14, 15]. Currently, two PARPi agents (olaparib and talazoparib) have received US Food and Drug Administration (FDA) approval for use in patients with *gBRCA*-mutated *HER2* (erb-b2 receptor tyrosine kinase 2)-negative advanced breast cancer previously treated with chemotherapy and/or endocrine therapy, respectively [14].

Talazoparib is considered a reasonable first-line option for advanced breast cancer, as is olaparib. Therefore, the optimal choice of first-line treatment has not been determined. However, to our best knowledge, there have been no head-to-head trials comparing single-agent PARPi in *BRCA*-mutated *HER2*-negative advanced breast cancer [14], and only one traditional meta-analysis has compared all single-agent PARPi with treatment of physician's choice (TPC) [15]. The studies do not allow simultaneous comparison of all single-agent PARPi, constraining comparative assessment of the longer-term benefits and risks

associated with available promising therapy. Therefore, we performed a network meta-analysis (NMA) to compare single-agent PARPi for advanced breast cancer.

## RESULTS

### Search results and study characteristics

Overall, the database search identified 15,831 studies; 4,548 studies were excluded due to duplicate records and 11,238 studies were excluded based on the selection criteria after reading the title and abstract. Subsequently, 45 potentially relevant full-text articles were reviewed. After applying all the eligibility criteria, 43 studies were excluded because 25 were reviews, 14 were non-RCTs, three were case-reports, and one were not single-agent PARPi studies. Therefore, two RCTs, the EMBRACA and OlympiAD, were included in our NMA (Figure 1).

The trials involved a total of 733 patients: 492 received single-agent PARPi (OlympiAD, olaparib; EMBRACA, talazoparib) and 241 received TPC. The mean sample size was 366.5, ranging between 302 and 431. Regarding study quality, two domains had unclear risk of bias and five domains had low risk of bias; therefore, both RCTs were considered to have unclear risk of bias (Figure 2).

Tables 1 and 2 show the main characteristics of the RCTs. The two studies were randomized, controlled, open-label, multicenter international phase III trials with participation from 16–18 countries. The mean trial duration was 28.5 months (range, 15–42 months). In both RCTs, about half of the patients had TNBC; <30% of the participants had received platinum-based chemotherapy before participating in the RCTs.

Here, we included two RCTs fulfilling all the eligibility criteria, and there were no head-to-head studies assessing the differences between single-agent PARPi. Due to the absence of a loop connecting three arms, the node-splitting method was not calculated for all outcomes.

### Efficacy outcomes

Regarding efficacy, olaparib was not associated with improved PFS ( $HR = 1.08$ , 95%  $CrI = 0.34$ – $3.45$ ) when compared with talazoparib, and TPC conferred worse PFS ( $HR = 1.85$ , 95%  $CrI = 0.82$ – $4.15$ ). However, this was not statistically significant (Figure 3).

In subgroup analysis according to hormone receptor status, both olaparib and TPC conferred worse PFS in

the hormone receptor–positive subgroup compared with talazoparib, but statistical significance was not obtained (olaparib:  $HR = 1.74$ , 95%  $CrI = 0.43–6.69$ ; TPC:  $HR = 2.10$ , 95%  $CrI = 0.79–5.58$ ) (Figure 4A). In analyses of patients with TNBC, olaparib was associated with improved PFS ( $HR = 0.72$ , 95%  $CrI = 0.15–3.50$ ), while PFS was worst with TPC ( $HR = 1.68$ , 95%  $CrI = 0.55–5.05$ ) (Figure 4B). In the subgroup analysis according to prior exposure to platinum-based chemotherapy, olaparib was not associated with PFS (olaparib:  $HR = 0.90$ , 95%  $CrI = 0.32–2.49$ ) compared with talazoparib, and PFS was worst with TPC ( $HR = 1.31$ , 95%  $CrI =$

$0.60–2.84$ ) (Figure 4C). When analyzing patients in the no prior platinum subgroup, PFS was worse with both olaparib and TPC (olaparib:  $HR = 1.14$ , 95%  $CrI = 0.35–3.82$ ; TPC:  $HR = 1.90$ , 95%  $CrI = 0.81–4.40$ ) (Figure 4D).

In the subgroup analysis according to *BRCA* mutation type, olaparib was not associated with PFS, and PFS was worse with TPC in the *BRCA1* mutation subgroup (olaparib:  $HR = 0.91$ , 95%  $CrI = 0.28–3.01$ ; TPC:  $HR = 1.68$ , 95%  $CrI = 0.72–3.88$ ) compared with talazoparib (Figure 4E), both results did not reach statistical

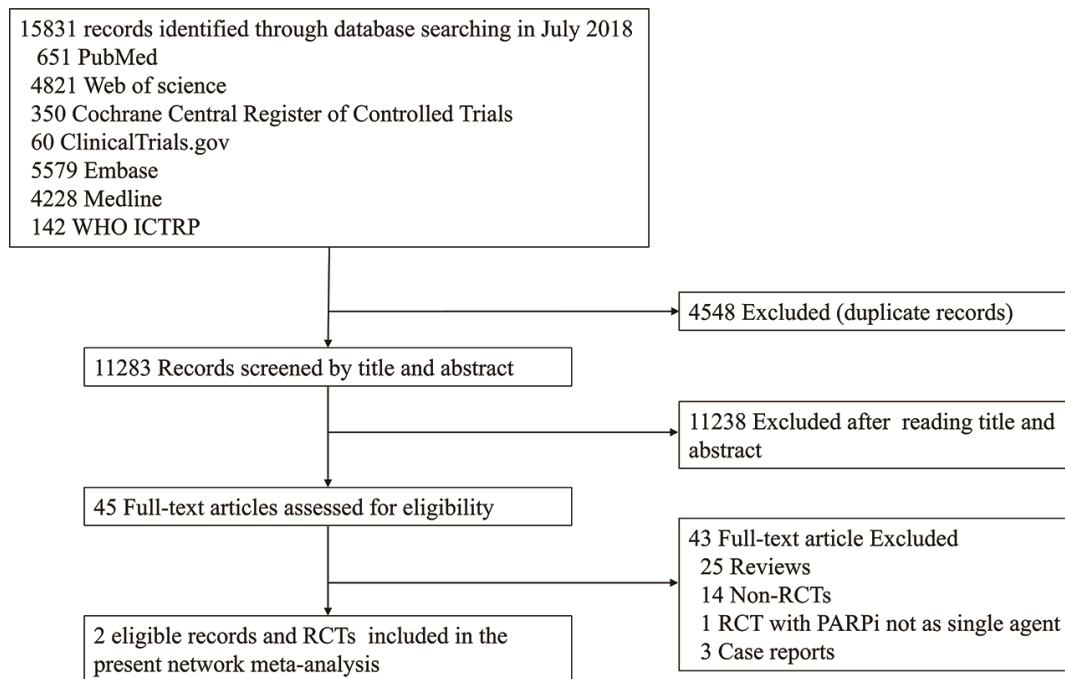

**Figure 1. The PRISMA flow chart summarizing the identification process of eligible studies.** WHO ICTRP, World Health Organization International Clinical Trials Registry Platform; PARPi, PARP inhibitor; RCT, randomized controlled trial.

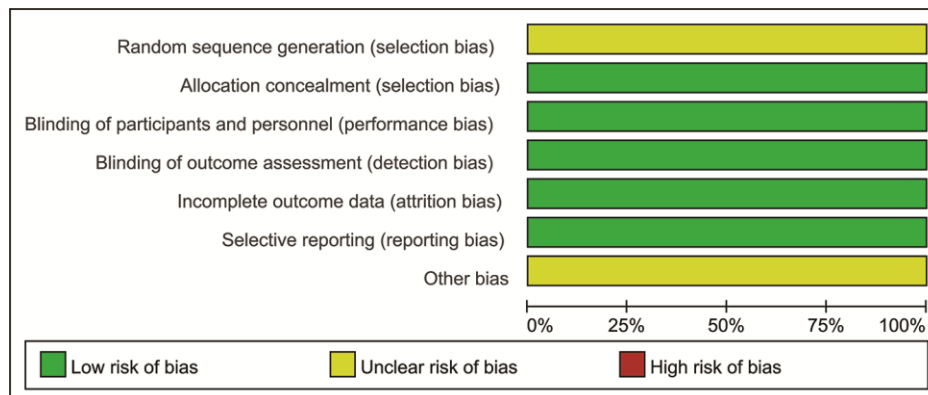

**Figure 2. Representation of potential bias in the included RCTs.**

**Table 1. Randomised controlled trials included in the systematic review and network meta-analysis.**

| Study             | Trials    | Clinical trial cycle (months) | data cutoff  | Trial phase | No. of center | BRCA mutation type | HR                | Stage of breast cancer                     | previous chemotherapy regimens for metastatic disease | previous cytotoxic regimens for advanced breast cancer |
|-------------------|-----------|-------------------------------|--------------|-------------|---------------|--------------------|-------------------|--------------------------------------------|-------------------------------------------------------|--------------------------------------------------------|
| Robson et al.2017 | Olymp iAD | 15                            | Dec.9, 2016  | III         | 18            | BRCA1/BRCA2/both   | positive/negative | metastatic breast cancer                   | no more than two                                      | unknown                                                |
| Litton et al.2018 | EMBR ACA  | 42                            | Sep.15, 2017 | III         | 16            | BRCA1/BRCA2        | positive/negative | metastatic or local advanced breast cancer | unknown                                               | no more than three                                     |

**Table 2. Characteristics of eligible studies.**

| Trials    | Sample sizes |         | Age range  |         | Drug type   |         | Dosage and frequency                |                                                                                                                                                                                                                                         | Crossover from control group to experimental group |
|-----------|--------------|---------|------------|---------|-------------|---------|-------------------------------------|-----------------------------------------------------------------------------------------------------------------------------------------------------------------------------------------------------------------------------------------|----------------------------------------------------|
|           | Experiment   | control | Experiment | control | Experiment  | control | Experiment                          | control                                                                                                                                                                                                                                 |                                                    |
| Olympi AD | 205          | 97      | 22–76      | 24–68   | Olaparib    | PTC     | 300 mg twice daily                  | standard therapy: eribulin mesylate administered intravenously at a dose of 1.4 mg on day 1 and day 8, repeated every 21 days; or vinorelbine administered intravenously at a dose of 30 mg on day 1 and day 8, repeated every 21 days. | not permitted                                      |
| EMBR ACA  | 287          | 144     | 27–84      | 24–88   | Talazoparib | PTC     | 1 mg orally once daily continuously | standard-therapy: capecitabine, eribulin, gemcitabine, or vinorelbine in continuous 21-day cycles                                                                                                                                       | not permitted                                      |

PTC: Standard-Therapy Group.

significance. When exploring the difference between subjects with *BRCA1* mutation, PFS was worse with both olaparib and TPC (olaparib: *HR* = 1.46, 95% *CrI* = 0.35–6.03; TPC: *HR* = 2.11, 95% *CrI* = 0.77–5.67), although significant associations were not recognized (Figure 4F). Similar results were obtained when we analyzed only the subjects who had not received prior chemotherapy (olaparib: *HR* = 1.01, 95% *CrI* = 0.30–3.41; TPC: *HR* = 1.76, 95% *CrI* = 0.75–4.04) (Figure 4G).

We defined OS and ORR as secondary efficacy outcomes: when compared with talazoparib, the NMA of OS showed that PFS might be worse with olaparib and TPC, but the differences were short of statistical significance (olaparib: *HR* = 1.18, 95% *CrI* = 0.61–2.31; TPC: *HR* = 1.31, 95% *CrI* = 0.83–2.07) (Figure 5A). Regarding ORR, compared with talazoparib, both

olaparib and TPC were associated with non-significantly improved ORR (olaparib: *OR* = 0.83, 95% *CrI* = 0.05–12.64; TPC: *OR* = 0.22, 95% *CrI* = 0.03–1.50) (Figure 5B).

**Safety**

Here, major hematologic AEs were defined as primary safety outcome, and included anemia, neutropenia, and decreased white cell count. In the olaparib trial, grade 3–4 anemia was reported in 82 of 205 patients in the olaparib group and in 24 of 91 patients in the TPC group. In the talazoparib trial, grade 3–4 anemia was reported in 151 of 286 patients in the talazoparib group and in 23 of 126 patients in the control group. Compared with talazoparib, olaparib and TPC reduced the risk of developing grade 3–4 anemia (olaparib: *OR* = 0.34, 95% *CrI* = 0.003–34.94; TPC: *OR* = 0.07,

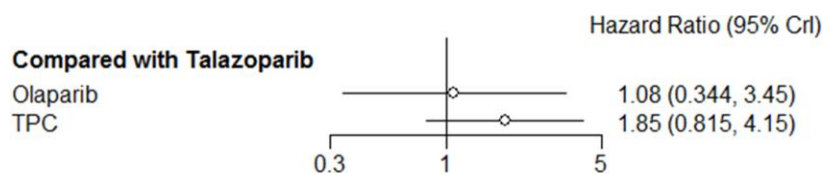

**Figure 3. Forest plot comparing PFS for talazoparib, olaparib, and TPC.**

95% *CrI* = 0.003–1.86) (Figure 6A) and any-grade anemia (olaparib: *OR* = 0.37, 95% *CrI* = 0.02–6.81; TPC: *OR* = 0.20, 95% *CrI* = 0.03–1.52) (Figure 6B). Regarding neutropenia, olaparib showed grade 3–4 neutropenia compared with talazoparib (*OR* = 0.57, 95% *CrI* = 0.06–5.75), while TPC showed worse results (*OR* = 2.00, 95% *CrI* = 0.40–9.99) (Figure 6C). Similar results were obtained for any-grade neutropenia (olaparib: *OR* = 0.54, 95% *CrI* = 0.09–3.27; TPC: *OR* = 1.42, 95% *CrI* = 0.41–4.95) (Figure 6D). Similarly, olaparib had better decreased white cell count (grade 3–4) compared with talazoparib (*OR* = 0.42, 95% *CrI* = 0.04–4.19), while TPC had the worst result (*OR* = 1.32, 95% *CrI* = 0.28–6.19) (Figure 6E). The results were altered when we reanalyzed any-grade decreased white cell counts: Olaparib and TPC had better decreased white cell counts (olaparib: *OR* =

0.55, 95% *CrI* = 0.20–1.52; TPC: *OR* = 0.75, 95% *CrI* = 0.37–1.49) (Figure 6F).

The secondary safety outcome mainly included fatigue and headache. Compared with talazoparib, olaparib and TPC were associated with increased risk of grade 3–4 fatigue (olaparib: *OR* = 6.79, 95% *CrI* = 0.44–262.48; TPC: *OR* = 1.83, 95% *CrI* = 0.35–8.64) (Figure 7A). Regarding any-grade fatigue, olaparib and TPC did not show any significant difference compared with talazoparib (olaparib: *OR* = 1.01, 95% *CrI* = 0.42–2.40; TPC: *OR* = 0.74, 95% *CrI* = 0.43–1.28) (Figure 7B). Regarding headache, olaparib and TPC had better grade 3–4 headache compared with talazoparib (olaparib: *OR* = 0.14, 95% *CrI* = 0.003–4.17; TPC: *OR* = 0.35, 95% *CrI* = 0.01–3.18) (Figure 7C). Similar results were obtained for any-grade headache (olaparib: *OR* = 0.82,

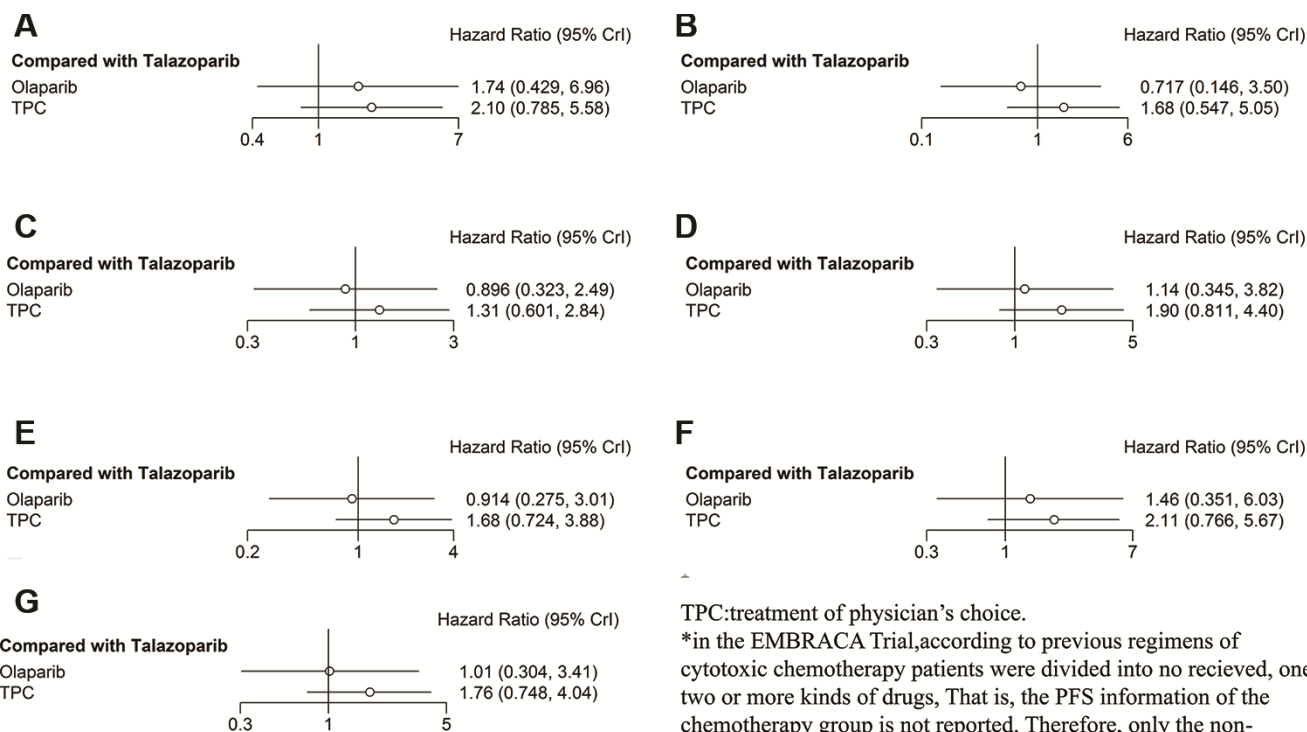

TPC:treatment of physician’s choice.

\*in the EMBRACA Trial,according to previous regimens of cytotoxic chemotherapy patients were divided into no recieved, one two or more kinds of drugs, That is, the PFS information of the chemotherapy group is not reported. Therefore, only the non-chemotherapy population was analyzed.

**Figure 4. Forest plots comparing PFS for talazoparib, olaparib, and TPC (subgroup analysis).** (A) Hormone receptor-positive patients; (B) patients with TNBC; (C) patients with prior platinum; (D) patients with no prior platinum; (E) patients with *BRCA1* mutation; (F) patients with *BRCA2* mutation; (G) patients who received no prior chemotherapy.

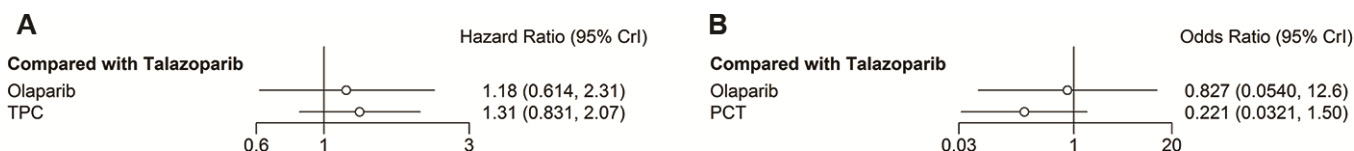

**Figure 5. Forest plots comparing OS and ORR for talazoparib, olaparib, and TPC.** (A) OS; (B) ORR.



95% *CrI* = 0.25–2.74; TPC: *OR* = 0.59, 95% *CrI* = 0.27–1.28) (Figure 7D).

### Acceptability

Regarding acceptability, the primary and secondary outcome was treatment discontinuation rate and time to QoL deterioration, respectively. Treatment was discontinued due to any-grade AEs by 10 and 7 patients in the olaparib and TPC group, respectively, and by 17 and 11 patients in the talazoparib and TPC group, respectively. Similarly, compared with talazoparib,

olaparib did not show any significant difference for treatment discontinuation (*OR* = 0.93, 95% *CrI* = 0.20–4.37), and TPC conferred higher risk, while no significant differences were found (*OR* = 1.49, 95% *CrI* = 0.55–3.93) (Figure 8A).

Regarding time to QoL deterioration, olaparib and TPC were associated with short time to clinically meaningful QoL deterioration compared with talazoparib (olaparib: *HR* = 1.16, 95% *CrI* = 0.19–7.17; TPC: *HR* = 2.64, 95% *CrI* = 0.75–9.39), while no significant difference was obtained (Figure 8B).

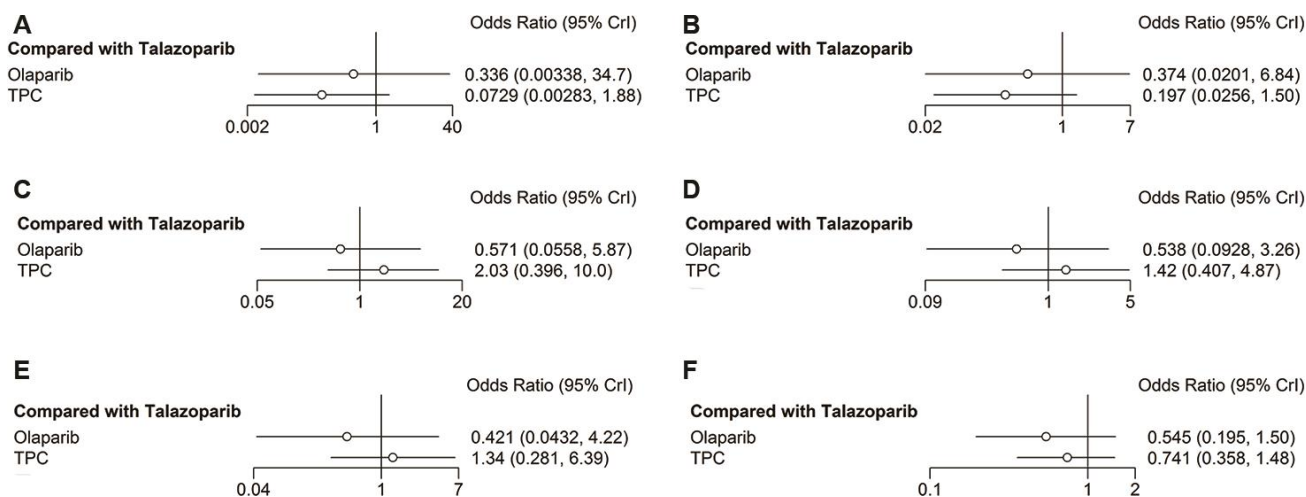

**Figure 6.** Forest plots comparing any-grade and grade 3–4 hematological AEs. (A) Grade 3–4 anemia; (B) any-grade anemia; (C) grade 3–4 neutropenia; (D) any-grade neutropenia; (E) grade 3–4 decreased white cell count; (F) any-grade decreased white cell count.

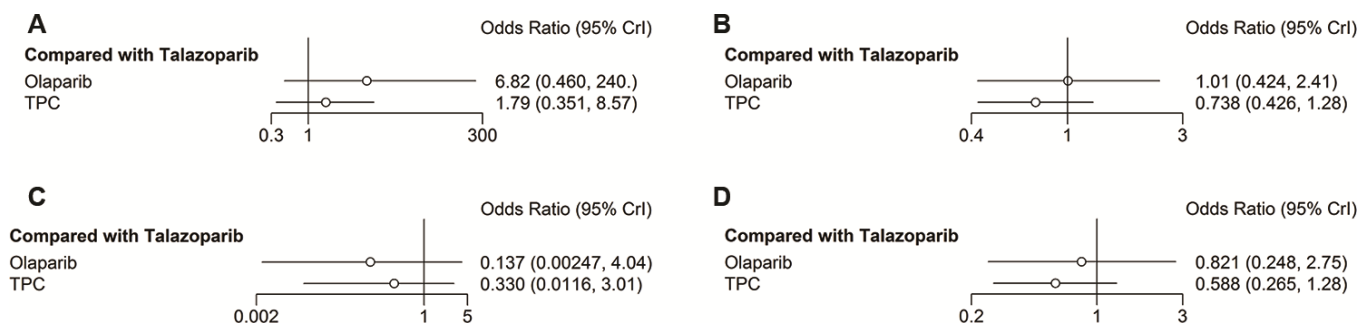

**Figure 7.** Forest plots comparing any-grade and grade 3–4 non-hematological/any AEs. (A) Grade 3–4 fatigue; (B) any-grade fatigue; (C) grade 3–4 headache; (D) any-grade headache.

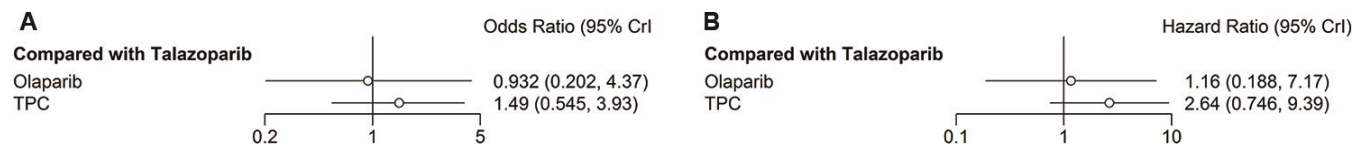

**Figure 8.** Forest plots comparing acceptability of treatment discontinuation and QoL. (A) Treatment discontinuation; (B) QoL.

## DISCUSSION

We conducted an NMA to compare the efficacy, safety, and acceptability of single-agent PARPi. To the best of our knowledge, ours is the first NMA to compare the effect of different treatments with single PARPi in patients with advanced breast cancer. Both included articles showed that single-agent PARPi conferred a significant benefit over TPC for PFS. The NMA showed no statistically significant difference between olaparib and talazoparib in terms of efficacy, safety, and acceptability, which means that the two FDA-approved single-agent PARPi have similar efficacy, safety, and acceptability when used for treating patients with advanced breast cancer.—Another point worth mentioning is that PARP enzymes are essential in DNA damage repair. With defective homologous recombination DNA repair, *BRCA1*- and *BRCA2*-mutated breast cancers are targets for PARPi through the exploitation of synthetic lethality. Therefore, PARPi confer an advantage in breast cancer therapy based on biological principles.

However, some limitations of the present NMA should be acknowledged. We included only two RCTs in our study. Further studies should attempt to expand the sample size for in-depth re-analysis by including more RCTs. Nevertheless, we deeply believe that the analyses performed may aid in presenting a brief assessment of the role of single-agent PARPi for managing patients with *BRCA*-mutated *HER2*-negative advanced breast cancer.

In conclusion, any single-agent PARPi has similar efficacy, safety, and acceptability in patients with *BRCA*-mutated *HER2*-negative metastatic or advanced breast cancer. Although the optimal choice of single-agent PARPi, as well as the possible combination strategies with other therapies, has not been determined, single-agent PARPi can now be regarded as a similar option in the therapeutic armamentarium for patients with *BRCA*-mutated *HER2*-negative metastatic or advanced breast cancer.

## MATERIAL AND METHODS

### Search strategy and selection criteria

This study is registered with PROSPERO (CRD42019138939) and is reported according to the Preferred Reporting Items for Systematic Reviews and Meta-Analyses (PRISMA) extension statement for NMA [16].

For this NMA, we searched Web of Science, Embase, PubMed, Medline, ClinicalTrials.gov, the Cochrane

Central Register of Controlled Trials, and the World Health Organization (WHO) International Clinical Trials Registry Platform (ICTRP) from the date of inception to July 20, 2019, with no language restrictions. References derived from full text review were screened to identify potential randomized controlled trials (RCTs) that had not been indexed in the above databases.

We used a prespecified search strategy using terms applicable to the population of interest. The search strategy was designed using a combination of medical subject headings (MeSH) and keywords. The MeSH and keywords included “breast”, “mammary”, “cancer”, “cancers”, “tumor”, “neoplasm”, “carcinoma”, “poly(ADP-ribose) polymerase inhibitors”, “poly(ADP-ribose) polymerases”, “PARPi”, PARPi names (olaparib, veliparib, niraparib, rucaparib, talazoparib), and synonymous words. The reference lists from relevant studies, meta-analyses and reviews were manually screened for potentially eligible publications.

The electronic database searches were supplemented with manual searches for published, unpublished, and ongoing RCTs in international trial registers, drug approval agency websites, and key scientific journals in the field [13], and important professional conferences such as that of the American Society of Clinical Oncology (ASCO).

### Study selection

Four investigators (JW, YZ, LY, LR) selected the studies independently. The titles and abstracts of identified publications were screened; potentially eligible articles were retrieved for full-text review. Disagreements were resolved by discussion with a fifth author (XQ).

Eligible studies were phase II or III RCTs for which efficacy and/or safety outcomes were available. Studies that compared any single-agent PARPi with standard mono-chemotherapy in patients with *BRCA*-mutated *HER2*-negative metastatic or advanced breast cancer were included. Eligible patients were at least 18 years of age and had *HER2*-negative breast cancer that was hormone receptor–positive or was triple negative. Furthermore, patients with confirmed deleterious *gBRCA* mutation and previous neoadjuvant or adjuvant treatment with platinum were included. Study subjects were limited to those with metastatic or local advanced breast cancer. We only included double-blind trials, and included placebo in the NMA, and we increased the methodological rigor of the study design by minimizing performance and ascertainment biases [17].

## Data extraction and quality assessment

Four investigators (JW, YZ, LY, LR) independently extracted and summarized the data from all included studies using a standardized data abstraction form and assessed the risk of bias. The standardized data extraction forms included the trial characteristics (e.g., publication year, first author, journal), subject characteristics (e.g., the number of patients, patient age, previous treatment), intervention details (e.g., PARPi type, dose, duration of treatment), and outcome measures (efficacy, safety, acceptability).

The quality of the included RCTs was assessed using the Cochrane risk of bias tool [18] on selection, attrition, performance, detection, and reporting bias. Each RCT was deemed to be at low, high, or unclear risk of bias based on its adequacy of random sequence generation; allocation concealment; participant and personnel blinding; outcome assessor blinding; and method of addressing incomplete data, selective reporting, and other potential sources of bias. Trials with a rating of high risk of bias in one or more domains were considered high risk, trials with low risk of bias in all domains were low risk, and trials with unclear risk of bias in one or more domains were unclear risk [19]. Four investigators (JW, YZ, LY, LR) were separately and independently assigned for each RCT. Any discrepancies were resolved by consensus or by a fifth investigator (XQ).

## Outcomes

The outcomes of interest were efficacy, safety, and acceptability. The primary efficacy outcome of interest was progression-free survival (PFS), the primary safety outcome of interest was major all-grade and high-grade (grade 3–4) treatment-related adverse events (AEs), and the primary acceptability outcome of interest was discontinued treatment due to AEs. Major AEs were defined as hematologic adverse events (we only focused on anemia, neutropenia, and decreased white cell count), assessed by concomitant medications and clinically relevant changes in laboratory values. The secondary efficacy outcomes included overall survival (OS) and objective response rate (ORR). The secondary safety outcome was defined as all-grade and high-grade (grade 3–4) non-hematologic AEs (fatigue, headache); the secondary acceptability outcome was impact on quality of life (QoL). Decreased QoL was defined as patients with clinically meaningful deterioration of QoL, as evaluated by the global health status/QoL scale on the EORTC QLQ-C30 (European Organization for Research and Treatment of Cancer QoL of cancer patients questionnaire).

## Statistical analysis

NMA was carried out using a random-effect model within a Bayesian framework and executed by R software using the *gemtc* package (version 3.5.1; R Foundation, Vienna, Austria) [20, 21], which recalls JAGS in R for Markov chain Monte Carlo (MCMC) sampling. MCMC methods were applied to calculate the hazard ratios (HRs) or odds ratios (ORs) with 95% credible intervals (CrIs). For each analysis, the function *mtc.run* was used to generate samples through MCMC sampler. Initially, 10,000 simulations were set up for each chain as the burn-in period, yielding 100,000 iterations to obtain the HRs or ORs of model parameters, while four Markov chains were run simultaneously. The Brooks-Gelman-Rubin statistic and trace plots were assessed to check whether the model convergence was satisfactory. The number of iterations would not increase if the model convergence was sufficient [22]. If closed loops existed in the network of comparisons in the present study, estimating incoherence and network-plot were carried out [23]. Furthermore, the inconsistency of the model was calculated using the node-splitting method, which separates evidence on a particular comparison into direct and indirect evidence [24, 25]. Inconsistency between indirect and direct sources of evidence was statistically assessed globally and locally [26]. The *mtc.anohet* command of the *gemtc* package was applied to evaluate global heterogeneity via the heterogeneity variance parameter  $I^2$ . If at least 10 legal studies were available, the Egger test and funnel plot were used to detect publication bias [27].

The pooled estimates of HRs with 95% CrIs were calculated for PFS, OS, and the time to QoL deterioration.  $HR < 1$  indicated lower probability of developing PFS and OS events, and delayed time to QoL deterioration. The pooled estimates of OR with 95% CrIs were calculated for the effect for ORR, AEs, and treatment discontinuation.  $OR > 1$  indicated lower ORR, AEs, and treatment discontinuation rates.

To determine whether the results were affected by study characteristics, we performed subgroup analyses for primary efficacy outcomes according to the following variables: previous chemotherapy, previous platinum-based therapy, hormone receptor status, and BRCA mutation type. Two-sided P-values of  $<0.05$  were considered statistically significant.

## Ethical statement

All authors are accountable for all aspects of the work in ensuring that questions related to the accuracy or integrity of any part of the work are appropriately investigated and resolved.



## Abbreviations

BC: breast cancer; HER-2: human epidermal growth factor receptor-2; ER: estrogen receptor; PR: progesterone receptor; gBRCA: germline BRCA; TNBC: triple-negative breast cancer.

## AUTHOR CONTRIBUTIONS

(I) Conception and design: J Wang, Y Zhang, X Qi; (II) conducted search strategy and selection criteria: J Wang, Y Zhang and X Qi; (III) made study selection, extracted data and assessed the risk of bias: J Wang, Y Zhang, L Yuan and L Ren.; (IV) Data analysis and interpretation: J Wang, Y Zhang, X Qi; (V) Manuscript writing: All authors; (VI) Final approval of manuscript: All authors.

## CONFLICTS OF INTEREST

The authors have no conflicts of interest to declare.

## FUNDING

This study was supported by the Talents Training Program of the Third Military Medical University (No. 2017MPRC-18) and the Military Medical Staff Innovation Plan of Southwest Hospital (No. SWH2018BJLC-04).

## REFERENCES

1. Ferlay J, Colombet M, Soerjomataram I, Mathers C, Parkin DM, Piñeros M, Znaor A, Bray F. Estimating the global cancer incidence and mortality in 2018: GLOBOCAN sources and methods. *Int J Cancer*. 2019; 144:1941–53.  
<https://doi.org/10.1002/ijc.31937> PMID:30350310
2. Tutt A, Robson M, Garber JE, Domchek SM, Audeh MW, Weitzel JN, Friedlander M, Arun B, Loman N, Schmutzler RK, Wardley A, Mitchell G, Earl H, et al. Oral poly(ADP-ribose) polymerase inhibitor olaparib in patients with BRCA1 or BRCA2 mutations and advanced breast cancer: a proof-of-concept trial. *Lancet*. 2010; 376:235–44.  
[https://doi.org/10.1016/S0140-6736\(10\)60892-6](https://doi.org/10.1016/S0140-6736(10)60892-6) PMID:20609467
3. Turnbull C, Ahmed S, Morrison J, Pernet D, Renwick A, Maranian M, Seal S, Ghoussaini M, Hines S, Healey CS, Hughes D, Warren-Perry M, Tapper W, et al, and Breast Cancer Susceptibility Collaboration (UK). Genome-wide association study identifies five new breast cancer susceptibility loci. *Nat Genet*. 2010; 42:504–07.  
<https://doi.org/10.1038/ng.586> PMID:20453838
4. Easton DF, Pooley KA, Dunning AM, Pharoah PD, Thompson D, Ballinger DG, Struewing JP, Morrison J, Field H, Luben R, Wareham N, Ahmed S, Healey CS, et al, and SEARCH collaborators, and kConFab, and AOC Management Group. Genome-wide association study identifies novel breast cancer susceptibility loci. *Nature*. 2007; 447:1087–93.  
<https://doi.org/10.1038/nature05887> PMID:17529967
5. Narod SA. Hormone replacement therapy and the risk of breast cancer. *Nat Rev Clin Oncol*. 2011; 8:669–76.  
<https://doi.org/10.1038/nrclinonc.2011.110> PMID:21808267
6. Dite GS, Jenkins MA, Southey MC, Hocking JS, Giles GG, McCredie MR, Venter DJ, Hopper JL. Familial risks, early-onset breast cancer, and BRCA1 and BRCA2 germline mutations. *J Natl Cancer Inst*. 2003; 95:448–57.  
<https://doi.org/10.1093/jnci/95.6.448> PMID:12644538
7. Domchek SM, Weber BL. Clinical management of BRCA1 and BRCA2 mutation carriers. *Oncogene*. 2006; 25:5825–31.  
<https://doi.org/10.1038/sj.onc.1209881> PMID:16998496
8. Bayraktar S, Gutierrez-Barrera AM, Liu D, Tasbas T, Akar U, Litton JK, Lin E, Albarracin CT, Meric-Bernstam F, Gonzalez-Angulo AM, Hortobagyi GN, Arun BK. Outcome of triple-negative breast cancer in patients with or without deleterious BRCA mutations. *Breast Cancer Res Treat*. 2011; 130:145–53.  
<https://doi.org/10.1007/s10549-011-1711-z> PMID:21830012
9. King MC, Marks JH, Mandell JB, and New York Breast Cancer Study Group. Breast and ovarian cancer risks due to inherited mutations in BRCA1 and BRCA2. *Science*. 2003; 302:643–46.  
<https://doi.org/10.1126/science.1088759> PMID:14576434
10. Walsh CS. Two decades beyond BRCA1/2: homologous recombination, hereditary cancer risk and a target for ovarian cancer therapy. *Gynecol Oncol*. 2015; 137:343–50.  
<https://doi.org/10.1016/j.ygyno.2015.02.017> PMID:25725131
11. Ashworth A. A synthetic lethal therapeutic approach: poly(ADP) ribose polymerase inhibitors for the treatment of cancers deficient in DNA double-strand break repair. *J Clin Oncol*. 2008; 26:3785–90.  
<https://doi.org/10.1200/JCO.2008.16.0812> PMID:18591545
12. Robson M, Im SA, Senkus E, Xu B, Domchek SM, Masuda N, Delaloge S, Li W, Tung N, Armstrong A, Wu W, Goessl C, Runswick S, Conte P. Olaparib for

- metastatic breast cancer in patients with a germline BRCA mutation. *N Engl J Med*. 2017; 377:523–33.  
<https://doi.org/10.1056/NEJMoa1706450>  
 PMID:28578601
13. Litton JK, Rugo HS, Ettl J, Hurvitz SA, Gonçalves A, Lee KH, Fehrenbacher L, Yerushalmi R, Mina LA, Martin M, Roché H, Im YH, Quek RG, et al. Talazoparib in patients with advanced breast cancer and a germline BRCA mutation. *N Engl J Med*. 2018; 379:753–63.  
<https://doi.org/10.1056/NEJMoa1802905>  
 PMID:30110579
  14. Lyons TG, Robson ME. Resurrection of PARP inhibitors in breast cancer. *J Natl Compr Canc Netw*. 2018; 16:1150–56.  
<https://doi.org/10.6004/jnccn.2018.7031>  
 PMID:30181424
  15. Poggio F, Bruzzone M, Ceppi M, Conte B, Martel S, Maurer C, Tagliamento M, Viglietti G, Del Mastro L, de Azambuja E, Lambertini M. Single-agent PARP inhibitors for the treatment of patients with BRCA-mutated HER2-negative metastatic breast cancer: a systematic review and meta-analysis. *ESMO Open*. 2018; 3:e000361.  
<https://doi.org/10.1136/esmooopen-2018-000361>  
 PMID:29942664
  16. Hutton B, Salanti G, Caldwell DM, Chaimani A, Schmid CH, Cameron C, Ioannidis JP, Straus S, Thorlund K, Jansen JP, Mulrow C, Catalá-López F, Gøtzsche PC, et al. The PRISMA extension statement for reporting of systematic reviews incorporating network meta-analyses of health care interventions: checklist and explanations. *Ann Intern Med*. 2015; 162:777–84.  
<https://doi.org/10.7326/M14-2385> PMID:26030634
  17. Hróbjartsson A, Thomsen AS, Emanuelsson F, Tendam B, Hilden J, Boutron I, Ravard P, Brorson S. Observer bias in randomized clinical trials with measurement scale outcomes: a systematic review of trials with both blinded and nonblinded assessors. *CMAJ*. 2013; 185:E201–11.  
<https://doi.org/10.1503/cmaj.120744>  
 PMID:23359047
  18. Higgins JP, Altman DG, Gøtzsche PC, Jüni P, Moher D, Oxman AD, Savovic J, Schulz KF, Weeks L, Sterne JA, and Cochrane Bias Methods Group, and Cochrane Statistical Methods Group. The Cochrane collaboration's tool for assessing risk of bias in randomised trials. *BMJ*. 2011; 343:d5928.  
<https://doi.org/10.1136/bmj.d5928>  
 PMID:22008217
  19. Higgins JP, Savović J, Page MJ, Elbers RG, Sterne JA. Chapter 8: Assessing risk of bias in a randomized trial. In: Higgins JPT, Thomas J, Chandler J, Cumpston M, Li T, Page MJ, Welch VA (editors). *Cochrane Handbook for Systematic Reviews of Interventions* version 6.1 (updated September 2020). Cochrane. 2020. [www.training.cochrane.org/handbook](http://www.training.cochrane.org/handbook)
  20. Valkenhoef Gv, Kuiper J. gemtc: Network Meta-Analysis Using Bayesian Methods. 2016. Valkenhoef Gv, Kuiper J. <https://CRAN.R-project.org/package=gemtc>
  21. Neupane B, Richer D, Bonner AJ, Kibret T, Beyene J. Network meta-analysis using R: a review of currently available automated packages. *PLoS One*. 2014; 9:e115065.  
<https://doi.org/10.1371/journal.pone.0115065>  
 PMID:25541687
  22. Yue-xiong Y, Wei Z, Xiao-yuan L, Juan Z, Ding-jun Z, Qiong-ying L. Result Interpretation of Network Meta-analysis. *Chinese Journal of Evidence-Based Medicine*. 2015; 15:103–109.
  23. Lumley T. Network meta-analysis for indirect treatment comparisons. *Stat Med*. 2002; 21:2313–24.  
<https://doi.org/10.1002/sim.1201> PMID:12210616
  24. Lu G, Ades AE. Assessing Evidence Inconsistency in Mixed Treatment Comparisons. *J Am Stat Assoc*. 2006; 101:447–459.  
<https://doi.org/10.1198/016214505000001302>
  25. Dias S, Welton NJ, Caldwell DM, Ades AE. Checking consistency in mixed treatment comparison meta-analysis. *Stat Med*. 2010; 29:932–44.  
<https://doi.org/10.1002/sim.3767>  
 PMID:20213715
  26. Chaimani A, Higgins JP, Mavridis D, Spyridonos P, Salanti G. Graphical tools for network meta-analysis in STATA. *PLoS One*. 2013; 8:e76654.  
<https://doi.org/10.1371/journal.pone.0076654>  
 PMID:24098547
  27. The Cochrane Collaboration. *Cochrane handbook for systematic reviews of interventions* (Version 5.1.0). 2018. <https://handbook-5-1.cochrane.org/>
